# Supplementary material for: Deep Radiotranscriptomics of Non-Small Cell Lung Carcinoma for Assessing Molecular and Histology Subtypes with a Data-Driven Analysis
Source: MDPI journal article supplement (doi:10.3390/diagnostics11122383), 2021-12-17
Supplement: s1 [file s1]

# Supplementary Materials: Deep Radiotranscriptomics of Non-Small Cell Lung Carcinoma for Assessing Molecular and Histology Subtypes with a Data-Driven Analysis

Eleftherios Trivizakis, Ioannis Souglakos, Apostolos H. Karantanas and Kostas Marias

## Tables

### Traditional Radiotranscriptomics:

**Table S1.** Performance of the ML-based pipeline on CT 3D radiomics, transcriptomics and radiotranscriptomics analysis. The highest overall score is presented in bold.

| Experiments        | Classifier  | Feature type         | ACC               | AUC               | SN                | SPC               |
|--------------------|-------------|----------------------|-------------------|-------------------|-------------------|-------------------|
| EGFR               | Sigmoid SVM | Radiotranscriptomics | <b>0.820±0.07</b> | <b>0.645±0.12</b> | <b>0.527±0.15</b> | 0.888±0.08        |
|                    |             | Transcriptomics      | 0.776±0.08        | 0.642±0.11        | 0.487±0.08        | 0.845±0.10        |
|                    |             | Radiomics            | 0.800±0.02        | 0.627±0.10        | 0.04±0.08         | <b>0.989±0.02</b> |
| KRAS               | Linear SVM  | Radiotranscriptomics | <b>0.730±0.05</b> | <b>0.719±0.07</b> | <b>0.34±0.27</b>  | 0.883±0.08        |
|                    |             | Transcriptomics      | 0.697±0.04        | 0.703±0.04        | 0.23±0.20         | 0.852±0.06        |
|                    |             | Radiomics            | 0.726±0.06        | 0.437±0.19        | 0.09±0.11         | <b>0.903±0.07</b> |
| Histology Subtypes | Linear SVM  | Radiotranscriptomics | <b>0.907±0.05</b> | <b>0.943±0.03</b> | <b>0.797±0.12</b> | <b>0.941±0.03</b> |
|                    |             | Transcriptomics      | 0.896±0.04        | 0.932±0.04        | 0.757±0.08        | 0.939±0.04        |
|                    |             | Radiomics            | 0.799±0.08        | 0.715±0.10        | 0.427±0.24        | 0.892±0.06        |

**Table S2.** Performance of the SMOTE ML-based pipeline on CT 3D radiomics, transcriptomics and radiotranscriptomics analysis. The highest overall score is presented in bold.

| Experiments        | Classifier    | Feature type         | ACC               | AUC               | SN                | SPC               |
|--------------------|---------------|----------------------|-------------------|-------------------|-------------------|-------------------|
| EGFR               | Sigmoid SVM   | Radiotranscriptomics | <b>0.761±0.10</b> | <b>0.726±0.10</b> | <b>0.600±0.16</b> | 0.800±0.11        |
|                    |               | Transcriptomics      | 0.759±0.10        | 0.677±0.13        | 0.533±0.19        | <b>0.813±0.10</b> |
|                    |               | Radiomics            | 0.557±0.03        | 0.549±0.07        | 0.530±0.13        | 0.567±0.07        |
| KRAS               | Decision Tree | Radiotranscriptomics | <b>0.664±0.11</b> | <b>0.603±0.15</b> | <b>0.493±0.22</b> | 0.713±0.09        |
|                    |               | Transcriptomics      | 0.635±0.09        | 0.502±0.15        | 0.256±0.28        | <b>0.747±0.09</b> |
|                    |               | Radiomics            | 0.505±0.06        | 0.428±0.05        | 0.287±0.12        | 0.569±0.09        |
| Histology Subtypes | Sigmoid SVM   | Radiotranscriptomics | <b>0.847±0.07</b> | <b>0.907±0.05</b> | <b>0.643±0.34</b> | <b>0.917±0.05</b> |
|                    |               | Transcriptomics      | 0.821±0.06        | 0.871±0.05        | 0.543±0.19        | 0.908±0.03        |
|                    |               | Radiomics            | 0.713±0.07        | 0.642±0.06        | 0.100±0.2         | 0.864±0.08        |

Deep Radiotranscriptomics:**Table S3.** Performance of the ML-based pipeline on deep descriptors, transcriptomics and deep radiotranscriptomics analysis. The highest overall score is presented in bold.

| Experiments           | Classifier     | Deep Model<br>(Layers) | Feature type                 | ACC               | AUC               | SN                | SPC               |
|-----------------------|----------------|------------------------|------------------------------|-------------------|-------------------|-------------------|-------------------|
| EGFR                  | Sigmoid<br>SVM | ResNetV2<br>(101)      | Deep<br>Radiotranscriptomics | 0.768±0.06        | 0.634±0.24        | 0.250±0.25        | 0.907±0.08        |
|                       |                | -                      | Transcriptomics              | <b>0.807±0.13</b> | <b>0.712±0.26</b> | <b>0.407±0.27</b> | <b>0.910±0.09</b> |
|                       |                | ResNetV2<br>(101)      | Deep Features                | 0.757±0.08        | 0.595±0.19        | 0.23±0.16         | 0.892±0.08        |
| KRAS                  | Linear<br>SVM  | DenseNet<br>(169)      | Deep<br>Radiotranscriptomics | <b>0.865±0.08</b> | <b>0.831±0.09</b> | <b>0.512±0.25</b> | <b>0.974±0.03</b> |
|                       |                | -                      | Transcriptomics              | 0.768±0.08        | 0.611±0.22        | 0.33±0.25         | 0.889±0.03        |
|                       |                | DenseNet<br>(169)      | Deep Features                | 0.619±0.06        | 0.582±0.06        | 0.347±0.20        | 0.709±0.08        |
| Histology<br>Subtypes | Sigmoid<br>SVM | ResNet (101)           | Deep<br>Radiotranscriptomics | <b>0.888±0.07</b> | <b>0.925±0.04</b> | <b>0.743±0.16</b> | 0.933±0.06        |
|                       |                | -                      | Transcriptomics              | 0.840±0.07        | 0.906±0.06        | 0.733±0.22        | 0.875±0.07        |
|                       |                | ResNet (101)           | Deep Features                | 0.763±0.06        | 0.410±0.13        | 0.04±0.08         | <b>0.946±0.05</b> |

**Table S4.** Performance of the SMOTE ML-based pipeline on deep descriptors, transcriptomics and deep radiotranscriptomics analysis. The highest overall score is presented in bold.

| Experiments           | Classifier       | Deep Model<br>(Layers) | Feature type                 | ACC               | AUC               | SN                | SPC               |
|-----------------------|------------------|------------------------|------------------------------|-------------------|-------------------|-------------------|-------------------|
| EGFR                  | Decision<br>Tree | ResNet (50)            | Deep<br>Radiotranscriptomics | <b>0.805±0.05</b> | <b>0.747±0.14</b> | <b>0.627±0.33</b> | <b>0.869±0.06</b> |
|                       |                  | -                      | Transcriptomics              | 0.749±0.06        | 0.647±0.13        | 0.453±0.28        | 0.841±0.07        |
|                       |                  | ResNet (50)            | Deep Features                | 0.722±0.09        | 0.557±0.10        | 0.29±0.20         | 0.824±0.10        |
| KRAS                  | RBF-SVM          | DenseNet<br>(169)      | Deep<br>Radiotranscriptomics | 0.728±0.07        | <b>0.736±0.09</b> | <b>0.353±0.23</b> | 0.840±0.12        |
|                       |                  | -                      | Transcriptomics              | <b>0.743±0.06</b> | 0.542±0.14        | 0.130±0.17        | <b>0.920±0.08</b> |
|                       |                  | DenseNet<br>(169)      | Deep Features                | 0.717±0.08        | 0.642±0.11        | 0.307±0.27        | 0.849±0.14        |
| Histology<br>Subtypes | k-NN             | MobileNet              | Deep<br>Radiotranscriptomics | 0.838±0.02        | <b>0.908±0.05</b> | <b>0.600±0.0</b>  | 0.909±0.03        |
|                       |                  | -                      | Transcriptomics              | <b>0.839±0.07</b> | 0.729±0.05        | 0.400±0.20        | 0.970±0.03        |
|                       |                  | MobileNet              | Deep Features                | 0.786±0.0         | 0.567±0.02        | 0.09±0.07         | <b>1.000±0.0</b>  |

**Table S5.** The most significant transcriptomic features.

| <b>Transcriptomics</b> |             |                           |
|------------------------|-------------|---------------------------|
| <i>EGFR</i>            | <i>KRAS</i> | <b>Histology Subtypes</b> |
| ASAP3                  | BBS2        | CLSTN1                    |
| C1orf52                | COQ4        | DGKA                      |
| CDV3                   | CUL4A       | FRMD8                     |
| DAGLB                  | DLEU2       | FYCO1                     |
| ENAH                   | DNAJC7      | GOLGA3                    |
| FAM160A2               | FZD4        | HIST1H4H                  |
| GOLGA1                 | LMNA        | IGFBP5                    |
| GPD1L                  | MYH9        | INPPL1                    |
| GSN                    | PITPNC1     | KIF3A                     |
| MGLL                   | PSME2       | LEPRE1                    |
| RBMX                   | RASSF4      | LIMA1                     |
| SIK1                   | S100A4      | PON2                      |
| TRAF3                  | S100A6      | PTP4A2                    |
| ZDHHC7                 | SAV1        | RNASEH1                   |
| ZMYND8                 | SH3TC1      | TPCN1                     |
| ZNF318                 | TROVE2      | USP31                     |
|                        | ZNF337      | XRCC1                     |

**Table S6.** The most significant radiomic features.

|                   | <b>Radiomics</b>                                                    |                                                                                                                                                                                                                                    |
|-------------------|---------------------------------------------------------------------|------------------------------------------------------------------------------------------------------------------------------------------------------------------------------------------------------------------------------------|
| <b>Experiment</b> | <b>Feature</b>                                                      | <b>Definition</b>                                                                                                                                                                                                                  |
| <i>EGFR</i>       | exp_1_original_gldm_DependenceNonUniformityNormalized               | measures the similarity of dependence throughout the image, with a lower value indicating more homogeneity among dependencies in the image.                                                                                        |
|                   | exp_1_original_glrlm_LongRunHighGrayLevelEmphasis                   | measures the joint distribution of long run lengths with higher gray-level values                                                                                                                                                  |
|                   | sq_1_original_glszm_ZoneEntropy                                     | the uncertainty/randomness in the distribution of zone sizes and gray levels. A higher value indicates more heterogeneity in the texture patterns.                                                                                 |
|                   | wavelet_bior1.3_1_original_glcm_MCC                                 | The Maximal Correlation Coefficient is a measure of complexity of the texture                                                                                                                                                      |
|                   | wavelet_bior5.5_1_original_ngtdm_Strength                           | Strength is a measure of the primitives in an image. Its value is high when the primitives are easily defined and visible, i.e. an image with slow change in intensity but more large coarse differences in gray level intensities |
| <i>KRAS</i>       | sq_1_original_glcm_ClusterShade                                     | Cluster Shade is a measure of the skewness and uniformity of the GLCM. A higher cluster shade implies greater asymmetry about the mean.                                                                                            |
|                   | sqrt_1_original_glcm_Idmn                                           | IDMN (inverse difference moment normalized) is a measure of the local homogeneity of an image.                                                                                                                                     |
|                   | wavelet_coif5_1_original_glcm_Idmn                                  |                                                                                                                                                                                                                                    |
|                   | wavelet_db4_1_original_gldm_LargeDependenceLowGrayLevelEmphasis     | Measures the joint distribution of large dependence with lower gray-level values.                                                                                                                                                  |
|                   | wavelet_rbio2.4_1_original_gldm_LargeDependenceLowGrayLevelEmphasis |                                                                                                                                                                                                                                    |
|                   | wavelet_rbio3.1_1_original_gldm_LargeDependenceLowGrayLevelEmphasis |                                                                                                                                                                                                                                    |
|                   | wavelet_rbio3.1_1_original_ngtdm_Complexity                         | a measure of texture complexity, quantifying non-uniformity and sudden changes in intensity values within the region of interest                                                                                                   |

|                                                                                                                                                                                                                                                                                                                                                                                                             |                                                                   |                                                                                                                                                |
|-------------------------------------------------------------------------------------------------------------------------------------------------------------------------------------------------------------------------------------------------------------------------------------------------------------------------------------------------------------------------------------------------------------|-------------------------------------------------------------------|------------------------------------------------------------------------------------------------------------------------------------------------|
| Histology Subtypes                                                                                                                                                                                                                                                                                                                                                                                          | exp_1_original_glszm_ZonePercentage                               | measures the coarseness of the texture by taking the ratio of number of zones and number of voxels in the ROI.                                 |
|                                                                                                                                                                                                                                                                                                                                                                                                             | grad_1_original_firstorder_TotalEnergy                            | Total Energy is the value of Energy feature scaled by the volume of the voxel in cubic mm                                                      |
|                                                                                                                                                                                                                                                                                                                                                                                                             | sq_1_original_firstorder_90Percentile                             |                                                                                                                                                |
|                                                                                                                                                                                                                                                                                                                                                                                                             | sq_1_original_glszm_SizeZoneNonUniformityNormalized               | the variability of size zone volumes throughout the image, with a lower value indicating more homogeneity among zone size volumes in the image |
|                                                                                                                                                                                                                                                                                                                                                                                                             | sqrt_1_original_glcmm_ClusterShade                                |                                                                                                                                                |
|                                                                                                                                                                                                                                                                                                                                                                                                             | wavelet_bior3.3_1_original_glcmm_ClusterShade                     |                                                                                                                                                |
|                                                                                                                                                                                                                                                                                                                                                                                                             | wavelet_bior5.5_1_original_glcmm_MCC                              |                                                                                                                                                |
|                                                                                                                                                                                                                                                                                                                                                                                                             | wavelet_bior5.5_1_original_glszm_LargeAreaHighGrayLevelEmphasis   | measures the proportion in the image of the joint distribution of larger size zones with higher gray-level values                              |
|                                                                                                                                                                                                                                                                                                                                                                                                             | wavelet_coif3_1_original_glszm_SmallAreaHighGrayLevelEmphasis     | measures the proportion in the image of the joint distribution of smaller size zones with higher gray-level values.                            |
|                                                                                                                                                                                                                                                                                                                                                                                                             | wavelet_db6_1_original_firstorder_Minimum                         |                                                                                                                                                |
|                                                                                                                                                                                                                                                                                                                                                                                                             | wavelet_sym4_1_original_gldm_SmallDependenceHighGrayLevelEmphasis | measures the joint distribution of small dependence with higher gray-level values.                                                             |
| exp, exponential; sq, square; sqrt, square root; grad, gradient; bior, biorthogonal; rbio, reverse biorthogonal; coif, coilet; db, daubechies; sym, symlet; GLCM, gray-level covariance matrix; GLDM, gray-level dependence matrix; GLRLM, gray-level run length matrix; NGTDM, neighborhood gray-tone difference matrix; MCC, maximal correlation coefficient; IDMN, inverse difference moment normalized; |                                                                   |                                                                                                                                                |

## Figures

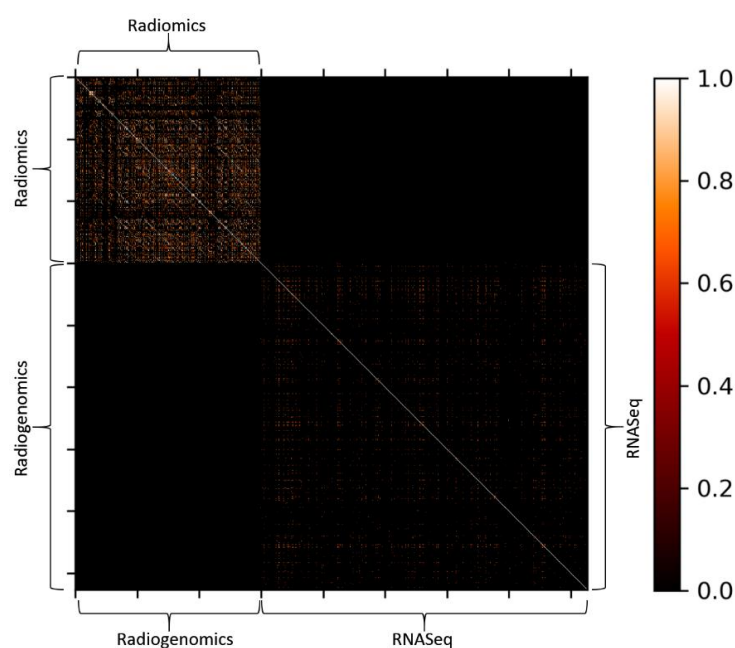

**Figure S1.** Spearman's correlations ( $\rho > 0.6$ ) among radiomic and transcriptomic features. No statistically significant radiogenomic correlations were found.

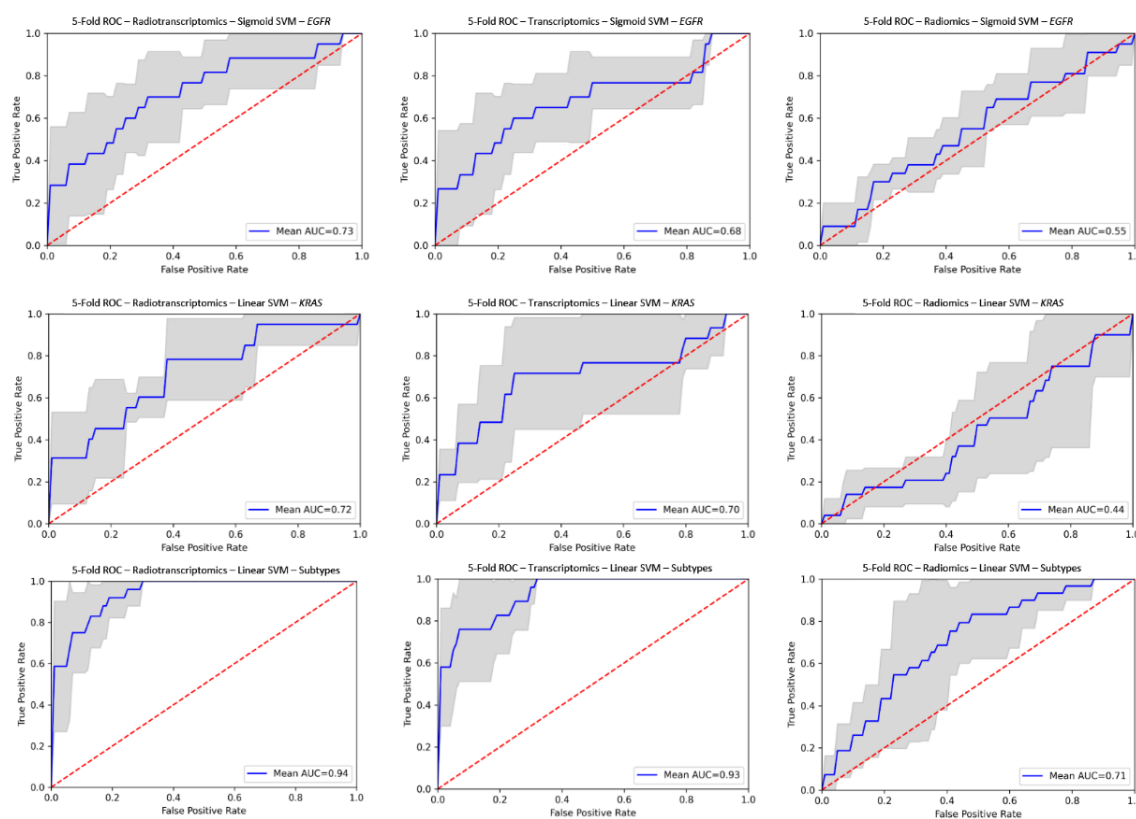

**Figure S2.** ROC curves for radiotranscriptomics (left column), transcriptomics (center column) and radiomics-based (right column) analysis. The top row represents EGFR (SMOTE), the middle row is KRAS and the bottom row is histology subtypes. The gray region represents the prediction variability among the unseen testing folds. AUC, area under curve; ROC, receiver operating characteristic; EGFR, epidermal growth factor receptor; KRAS, kirsten rat sarcoma; SVM, support vector machine; SMOTE, synthetic minority oversampling technique.

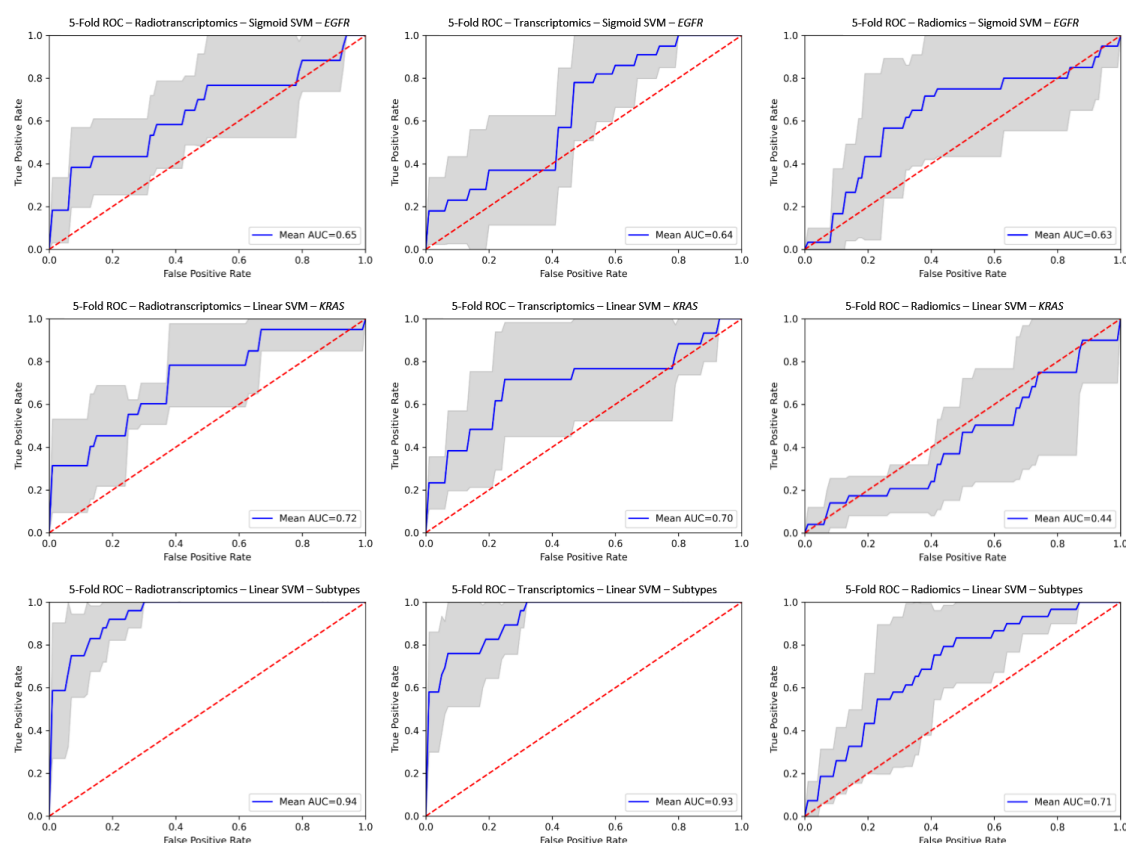

**Figure S3.** ROC curves for radiotranscriptomics (left column), transcriptomics (center column) and radiomics-based (right column) analysis. The top row represents EGFR, middle row KRAS and the bottom row histology subtypes.

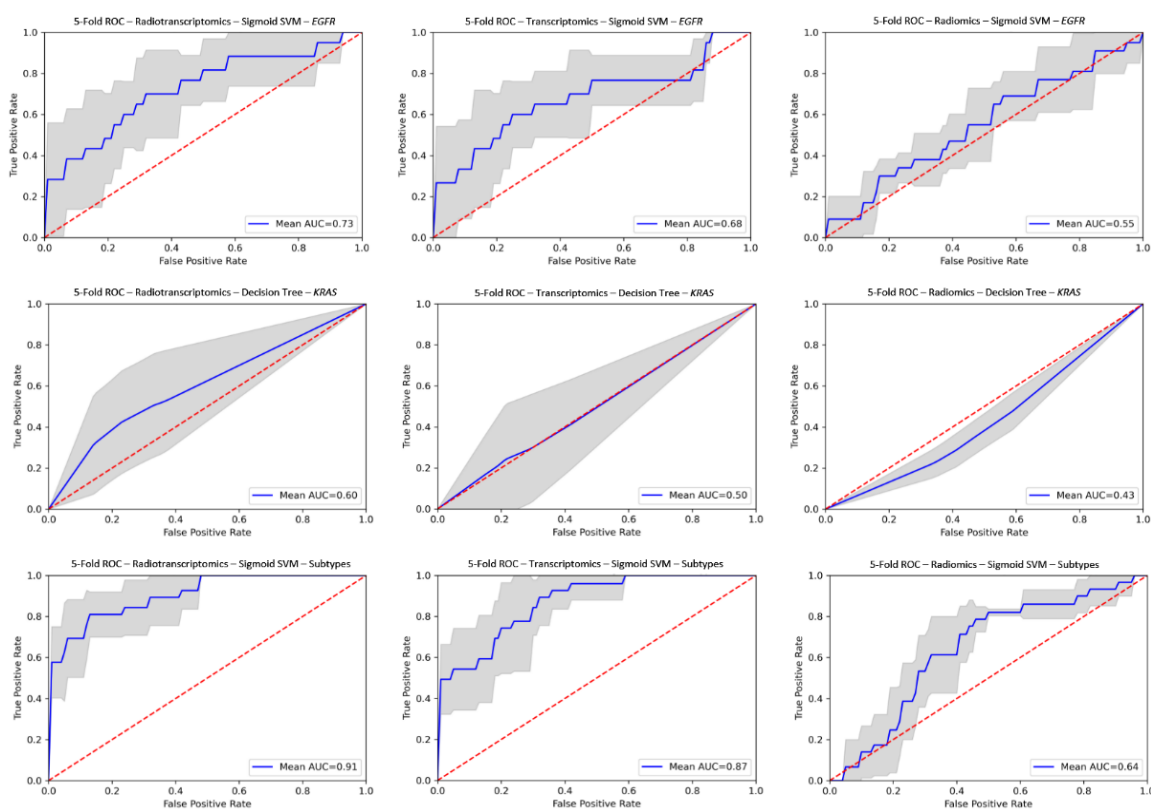

**Figure S4.** ROC curves for SMOTE radiotranscriptomics (left column), transcriptomics (center column) and radiomics-based (right column) analysis. The top row represents EGFR, middle row KRAS and the bottom row histology subtypes.

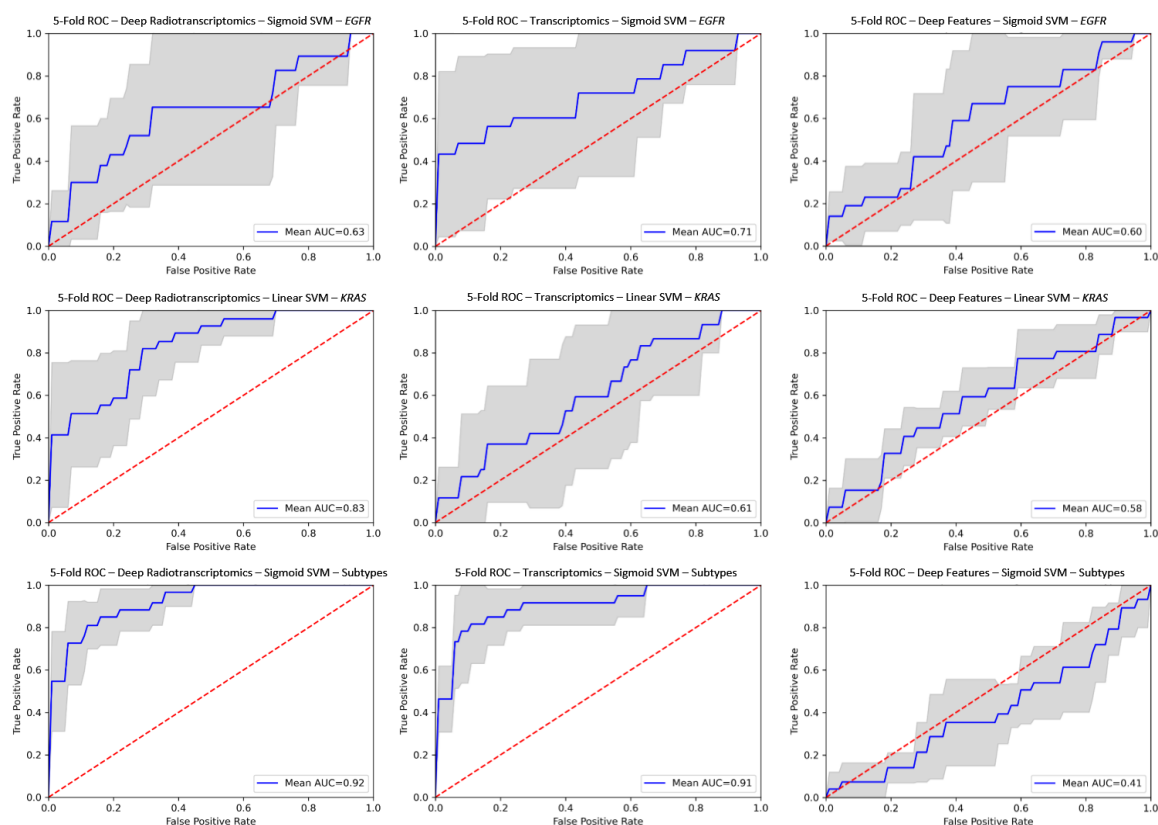

**Figure S5.** ROC curves for deep radiotranscriptomics (left column), transcriptomics (center column) and deep descriptor-based (right column) analysis. The top row represents EGFR, middle row KRAS and the bottom row histology subtypes.

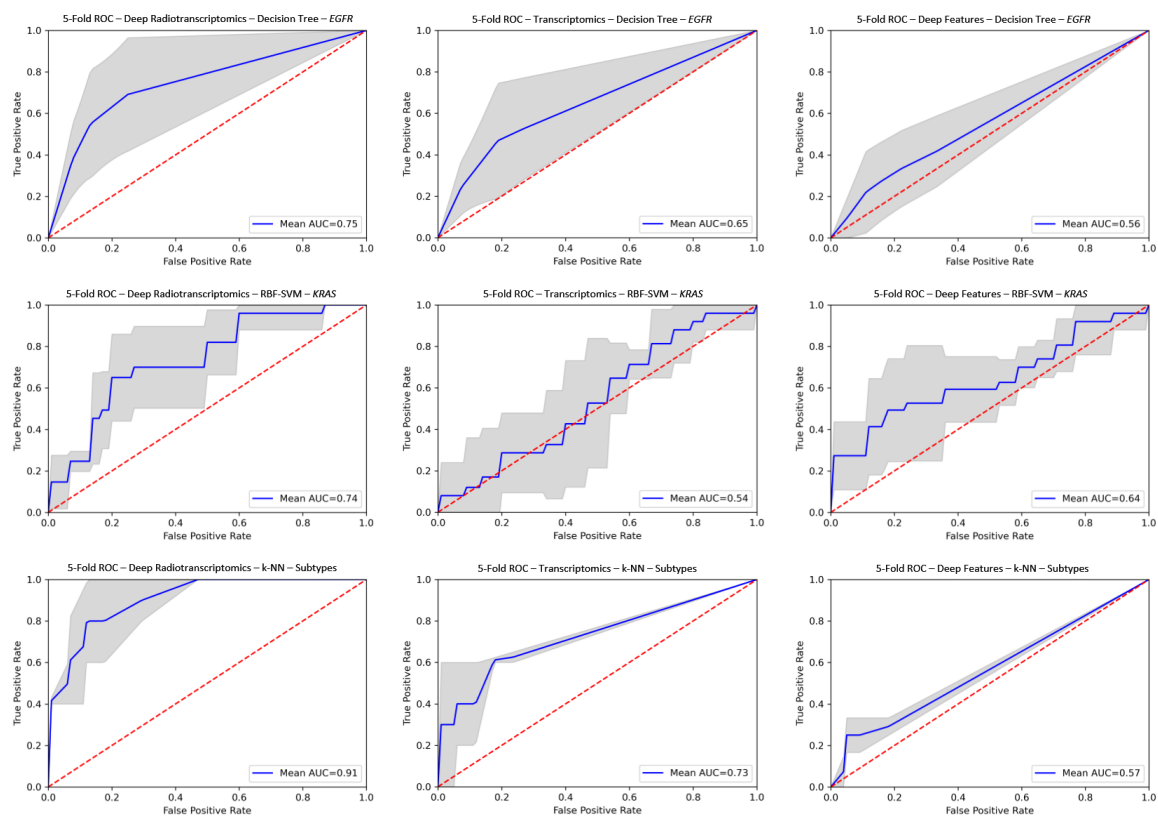

**Figure S6.** ROC curves for SMOTE deep radiotranscriptomics (left column), transcriptomics (center column) and deep descriptor-based (right column) analysis. The top row represents EGFR, middle row KRAS and the bottom row histology subtypes.
